# Supplementary material
Source: publisher figshare collection journal article supplement (https://acs.figshare.com/ndownloader/files/4674997)
Supplement: Supplementary file 1 [file 4674997]

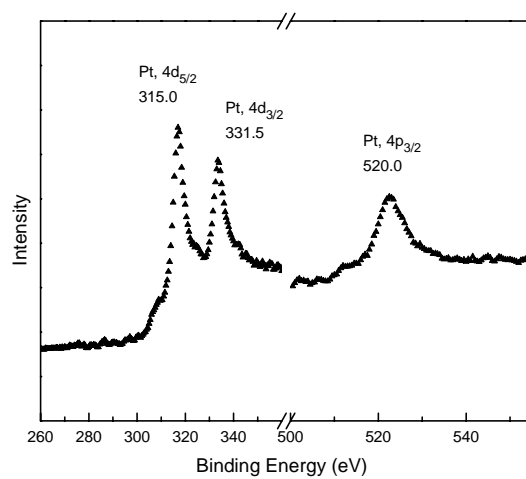

Figure 1S. XPS results taken from a survey spectrum showing the absence of C 1s (~285 eV) and O 1s (~532 eV) peaks for the clean surface.

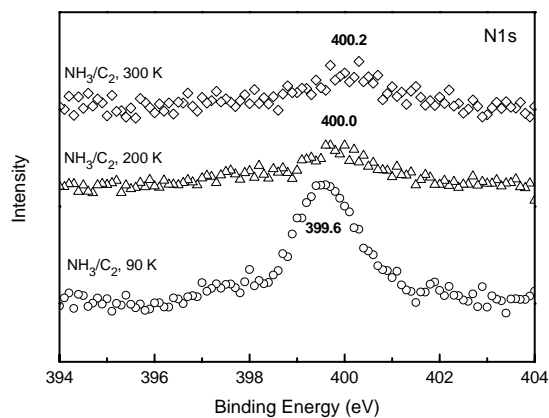

Figure S2. XPS results for the N 1s peak, analogous to those for the C 1s region shown in Figure 1. The peak at 399.6 eV after ammonia adsorption at 90 K is due to both multilayer and monolayer ammonia. The loss of intensity upon annealing to higher temperatures is due to desorption of excess ammonia. Nevertheless, the remaining N 1s peaks are shifted by about 0.6 eV to a higher binding energy. These spectra were recorded with a step size of 0.1 eV.
